# Supplementary material
Source: HighWire-hosted journal article supplement (https://ard.bmj.com/content/74/12/2144)
Supplement: inline-supplementary-material-1 [file inline-supplementary-material-1.pdf]

**Supplementary Table S1. Items in the preliminary 34-item questionnaire. \*Items 21 and**

28 were reversed scored.

|    |                                                              |                |
|----|--------------------------------------------------------------|----------------|
| 1  | My tophi are painful                                         | Agree/Disagree |
| 2  | I feel pain when my tophi are knocked                        | Agree/Disagree |
| 3  | I have difficulty walking because of my tophi                | Agree/Disagree |
| 4  | My tophi cause difficulty with gripping things               | Agree/Disagree |
| 5  | My tophi make it hard to lift heavy objects                  | Agree/Disagree |
| 6  | Bending down to the ground is difficult because of my tophi  | Agree/Disagree |
| 7  | Writing is difficult because of my tophi                     | Agree/Disagree |
| 8  | I have difficulty feeding myself because of my tophi         | Agree/Disagree |
| 9  | My tophi cause difficulty with getting dressed               | Agree/Disagree |
| 10 | My tophi cause difficulty in putting on socks and shoes      | Agree/Disagree |
| 11 | I have to make changes to my footwear because of my tophi    | Agree/Disagree |
| 12 | I have to buy special shoes because of my tophi              | Agree/Disagree |
| 13 | My tophi cause financial difficulty                          | Agree/Disagree |
| 14 | My tophi cause difficulty participating in family life       | Agree/Disagree |
| 15 | My tophi cause difficulty in my leisure activities           | Agree/Disagree |
| 16 | My tophi cause difficulty with doing household chores        | Agree/Disagree |
| 17 | My tophi cause difficulty doing my job                       | Agree/Disagree |
| 18 | I have difficulty doing outdoor work because of my tophi     | Agree/Disagree |
| 19 | I can only perform 'light activities' because of my tophi    | Agree/Disagree |
| 20 | I cannot play sport because of my tophi                      | Agree/Disagree |
| 21 | My tophi do not have any effect on my life                   | Agree/Disagree |
| 22 | I feel embarrassed because of my tophi                       | Agree/Disagree |
| 23 | My tophi cause others to feel uncomfortable                  | Agree/Disagree |
| 24 | My tophi affect me emotionally                               | Agree/Disagree |
| 25 | My tophi are unpleasant to look at                           | Agree/Disagree |
| 26 | My tophi are the only thing people focus on when they see me | Agree/Disagree |
| 27 | My life would be better if I could get rid of my tophi       | Agree/Disagree |
| 28 | My tophi do not bother me                                    | Agree/Disagree |
| 29 | My tophi have burst                                          | Agree/Disagree |
| 30 | My tophi have become infected                                | Agree/Disagree |
| 31 | I have visited my doctor for treatment of my tophi           | Agree/Disagree |
| 32 | I have had surgery for my tophi                              | Agree/Disagree |
| 33 | I can see my tophi getting smaller                           | Agree/Disagree |
| 34 | I can see my tophi getting bigger                            | Agree/Disagree |

**Supplementary Table S2. Items excluded from the preliminary 34-item questionnaire during Rasch analysis.**

| Iteration stage | Overall item-trait chi square before item removal (p-value) | Item Number | Item(s) removed                                              |
|-----------------|-------------------------------------------------------------|-------------|--------------------------------------------------------------|
| 1               | 394.48 (<0.001)                                             | 33          | I can see my tophi getting smaller                           |
|                 |                                                             | 34          | I can see my tophi getting bigger                            |
| 2               | 140.82 (<0.001)                                             | 15          | My tophi cause difficulty in my leisure activities           |
| 3               | 133.37 (<0.001)                                             | 18          | I have difficulty doing outdoor work because of my tophi     |
| 4               | 121.33 (<0.001)                                             | 4           | My tophi cause difficulty with gripping things               |
| 5               | 112.09 (<0.001)                                             | 16          | My tophi cause difficulty with doing household chores        |
| 6               | 97.22 (0.0005)                                              | 17          | My tophi cause difficulty doing my job                       |
| 7               | 79.40 (0.014)                                               | 29          | My tophi have burst                                          |
| 8               | 76.24 (0.016)                                               | 5           | My tophi make it hard to lift heavy objects                  |
| 9               | 72.45 (0.21)                                                | 10          | My tophi cause difficulty in putting on socks and shoes      |
| 10              | 65.10 (0.05)                                                | 24          | My tophi affect me emotionally                               |
| 11              | 55.77 (0.15)                                                |             | -                                                            |
| 12              | 55.77 (0.15)                                                | 26          | My tophi are the only thing people focus on when they see me |
| 13              | 59.77 (0.06)                                                | 9           | My tophi cause difficulty with getting dressed               |
| 14              | 54.44 (0.09)                                                | 19          | I can only perform 'light activities' because of my tophi    |
| 15              | 44.41 (0.29)                                                |             | -                                                            |

**Supplementary Table S3. Conversion of TIQ-20 raw (ordinal scale) to the Rasch modelled (interval scale) scores.** To calculate the TIQ-20 raw score, each item is scored 1 if answered in the affirmative (agree). Items 12 and 17 are reverse scored. The TIQ-20 raw score is the sum of all item scores (maximum score 20, indicates severe tophus impact). TIQ-20 raw (ordinal scale) scores are converted to the Rasch modelled TIQ-20 (interval scale) scores using the table. The person location scores were added to 5 to give a notional range of 0 to 10 for the Rasch modelled TIQ-20 score.

| <b>Raw score</b> | <b>Mean Person-Location</b> | <b>TIQ-20 score</b> |
|------------------|-----------------------------|---------------------|
| 0                | -4.11                       | 0.89                |
| 1                | -3.23                       | 1.77                |
| 2                | -2.59                       | 2.41                |
| 3                | -2.11                       | 2.89                |
| 4                | -1.74                       | 3.26                |
| 5                | -1.39                       | 3.61                |
| 6                | -1.05                       | 3.95                |
| 7                | -.76                        | 4.24                |
| 8                | -.51                        | 4.49                |
| 9                | -.24                        | 4.76                |
| 10               | .02                         | 5.02                |
| 11               | .28                         | 5.28                |
| 12               | .55                         | 5.55                |
| 13               | .86                         | 5.86                |
| 14               | 1.12                        | 6.12                |
| 15               | 1.40                        | 6.40                |
| 16               | 1.73                        | 6.73                |
| 17               | 2.10                        | 7.10                |
| 18               | 2.56                        | 7.56                |
| 19               | 3.19                        | 8.19                |
| 20               | 4.06                        | 9.06                |
